# Supplementary material for: Development of Epigenetic Clocks for Key Ruminant Species
Source: MDPI journal article supplement (doi:10.3390/genes13010096), 2021-12-30
Supplement: s1 [file s1]

# Supplementary Material

**Table S1.** The Pearson correlation coefficients for the age estimates via LOSO cross-validation for each fold drop for clock 2 and clock 3. The data is trained on 3 species and tested on the omitted species. For each iteration we report the correlation between the transformed epigenetic age and the transformed age of the omitted species.

| Test species | LOSO CV correlation (Clock 2) | LOSO CV correlation (Clock 3) |
|--------------|-------------------------------|-------------------------------|
| Deer         | 0.93                          | 0.84                          |
| Cattle       | 0.96                          | 0.95                          |
| Goat         | 0.98                          | 0.92                          |
| Sheep        | 0.92                          | 0.89                          |
